# Supplementary material
Source: ML conference proceedings conference paper supplement (https://openaccess.thecvf.com/content/ICCV2025/html/Lin_SplArt_Articulation_Estimation_ICCV_2025_paper.html)
Supplement: Supplementary file 1 [file 9035_suppl.pdf › 9035_suppl.pdf]

# SPLART: Articulation Estimation and Part-Level Reconstruction with 3D Gaussian Splatting

## Supplementary Material

### 6. 3D Gaussian Splatting

3D Gaussian Splatting [26] (3DGS) is a method for reconstructing 3D scenes from posed images by representing the scene using Gaussian distributions in a continuous 3D space. Given a Gaussian blob parameterized by  $(\mu, R, S, \sigma)$ , where  $\mu \in \mathbb{R}^3$  denotes the position of the center (mean) of the Gaussian,  $R \in \mathbb{R}^{3 \times 3}$  is a rotation matrix that denotes its orientation,  $S \in \mathbb{R}^{3 \times 3}$  is the scale matrix (the scale matrix and rotation matrix determine the covariance matrix of the Gaussian), and  $\sigma \in \mathbb{R}^+$  denotes its opacity. By design, the influence of a Gaussian on a point  $\mathbf{x}$  is given by

$$g(\mathbf{x}|\mu, R, S, \sigma) = \sigma \exp \left( -\frac{1}{2}(\mathbf{x} - \mu)^T (RSS^T R^T)^{-1} (\mathbf{x} - \mu) \right). \quad (16)$$

In practice, 3D Gaussians are first projected to 2D given the camera view, while all Gaussians intersecting with a pixel's ray are sorted by depth for alpha-compositing. Please refer to Kerbl et al. [26] and Ye et al. [63] for more technical details. Compared to Neural Radiance Fields [38] (NeRFs), which represent a scene with radiance and density fields in the form of neural networks, 3DGS offers a much faster rendering speed (more than 100 $\times$  speed-up) thanks to the efficient rasterization of Gaussians.

### 7. Articulating the Gaussians

In SPLART, we articulate a Gaussian blob by (1) rotating by an angle  $\theta$  around a line specified by  $(\mathbf{p}, \mathbf{a})$ , where  $\mathbf{p}$  denotes the pivot point and  $\mathbf{a}$  denotes the axis direction; and (2) translating along the same line by distance  $d$ . We then need to update the parameters of the Gaussian  $(\mu', R', S', \sigma')$  to reflect this articulation. Further, letting  $\mathbf{d}$  be the camera-to-Gaussian direction computed after the articulated motion, we want to find out the actual direction  $\mathbf{d}'$  with which to query the radiance field (i.e., a spherical function represented by Spherical Harmonics).

Let  $\mathbf{x}'$  be the new point that results from applying the articulated motion to  $\mathbf{x}$ , which follows as

$$\mathbf{x}' = R_{\mathbf{a}, \theta}(\mathbf{x} - \mathbf{p}) + \mathbf{p} + d\mathbf{a}, \quad (17)$$

where  $R_{\mathbf{a}, \theta}$  is the matrix form of the axis-angle rotation  $(\mathbf{a}, \theta)$ . By definition,

$$g(\mathbf{x}' | \mu', R', S', \sigma') = g(\mathbf{x} | \mu, R, S, \sigma) \forall \mathbf{x}. \quad (18)$$

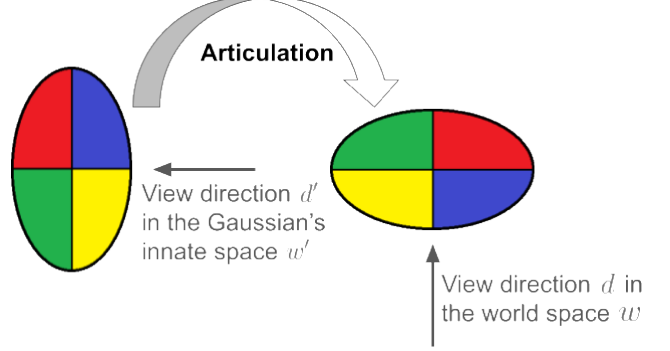

Figure 9. Since the radiance field is not modified by the articulation, we update the view direction when querying the Gaussian's radiance field in order to compensate for the articulation.

By plugging Equations 16 and 17 into Equation 18, the updated parameters follow as

$$\mu' = R_{\mathbf{a}, \theta}(\mu - \mathbf{p}) + \mathbf{p} + d\mathbf{a}, \quad (19a)$$

$$R' = R_{\mathbf{a}, \theta}R, \quad (19b)$$

$$S' = S, \quad (19c)$$

$$\sigma' = \sigma. \quad (19d)$$

Note that only the Gaussians are articulated, but not the radiance fields (since the coefficients of Spherical Harmonics are *not* changed). To determine the actual direction  $\mathbf{d}'$  with which to query the radiance field, imagine there is a world space  $w'$  that follows the same articulated motion, meaning that  $w'$  is stationary relative to the Gaussian blob. By definition, an articulated point  $\mathbf{x}'$  given by Equation 17 in the original world space  $w$  is still denoted as point  $\mathbf{x}$  in  $w'$ . So

$${}^wT_{w'}(\mathbf{x}) = R_{\mathbf{a}, \theta}(\mathbf{x} - \mathbf{p}) + \mathbf{p} + d\mathbf{a}, \quad (20)$$

where  ${}^wT_{w'}(\cdot)$  denotes the transformation from  $w'$  to  $w$ . Now, given view direction  $\mathbf{d}$  in  $w$ , the actual query direction is represented via the Gaussian's innate space, which can be computed as

$$\mathbf{d}' = {}^{w'}T_w(\mathbf{d}) \quad (21a)$$

$$= R_{\mathbf{a}, \theta}^{-1}\mathbf{d}. \quad (21b)$$

See Figure 9 for an illustration.

### 8. Implementation

SPLART leverages *nerfstudio* [53] and *gsplat* [63], widely used open-source libraries for neural rendering and Gaus-

sian splatting, respectively. We apply consistent hyperparameters across all experiments, spanning synthetic and real-world datasets. Optimization stages vary in termination criteria: those driven by geometric consistency—Stages 2(a), 3(a), and 3(c)—halt upon convergence, assessed by the loss function’s rate of change, whereas those guided by photometric loss—Stages 1, 2(b), and 3(b)—stop after fixed iterations of 10 000, 5000, and 10 000, respectively. By contrast, *splatfacto* (*nerfstudio*’s default 3DGS implementation) uses 30 000 iterations. In Stage 3(a), we set  $K^m = K^{cm} = 3$  by default, with each optimization trial lasting 10 seconds to 1 minute on an RTX 2080 Ti. Consequently, SPLART’s total training time, approximately 20–30 minutes, is roughly twice that of *splatfacto*. For comparison, PARIS [30] requires 15–20 minutes, while DTA [60], including its LoFTR pixel-matching step, takes 35–45 minutes. At inference, rendering for novel view and articulation synthesis achieves 60–100 frames per second, varying with scene complexity due to the increased Gaussian count for intricate objects.

## 9. Robustness of Geometric Consistency

In Stage 3(a), we propose a practical strategy that involves multiple attempts using both mobile-only and cross-mobile geometric consistency for robust articulation estimation. For this approach to be effective, two prerequisites must be met: (1) a correct articulation should induce a lower loss than most, if not all, incorrect articulation estimates; and (2) the optimization should have a high likelihood of converging to the global optimum (indicated by the correctness of the articulation) for each randomized attempt, ensuring that a small number of trials is sufficient and robust. To verify that both prerequisites are satisfied, we design a dedicated experiment that involves 200 independent

optimization trials: 100 using mobile-only geometric consistency and 100 using cross-mobile geometric consistency, both performed based on the model checkpoint saved at the end of Stage 2(b). A trial is deemed successful if it meets a similar but slightly relaxed criterion (since the estimated articulation is still coarse at this stage). Additionally, we rank the loss of each trial in comparison to the other trials performed under the same formulation. In light of the prerequisites above, we are interested in seeing whether successful trials tend to exhibit lower loss compared to those that are unsuccessful. Figure 10 visualizes these results as a scatter plot for a set of objects from the SPLART-PMS dataset.

## 10. Additional Qualitative Results

We present more qualitative results, including comparison with PARIS [30] on part-level reconstruction and articulation estimation in Figure 12, and view synthesis for interpolated articulation states in Figure 11.

## 11. Per-Scene Quantitative Results

We quantitatively compare SPLART with baselines [30, 60] for each scene in PARIS-PMS and SPLART-PMS. See Tab. 5, Tab. 7, and Tab. 8 for articulation estimation results on PARIS-PMS, revolute cases of SPLART-PMS, and prismatic cases of SPLART-PMS, respectively. For novel view and articulation synthesis, we further include SSIM [58] and LPIPS [66] metrics (in addition to PSNR [21]) for rendering quality evaluation, and per-category intersection-over-union ratios (in addition to mIoU):  $\text{IoU}_s$  for the static part,  $\text{IoU}_m$  for the mobile part, and  $\text{IoU}_{bg}$  for the background. See Tab. 6, Tab. 9, and Tab. 10 for results on PARIS-PMS, revolute cases of SPLART-PMS, and prismatic cases of SPLART-PMS, respectively.

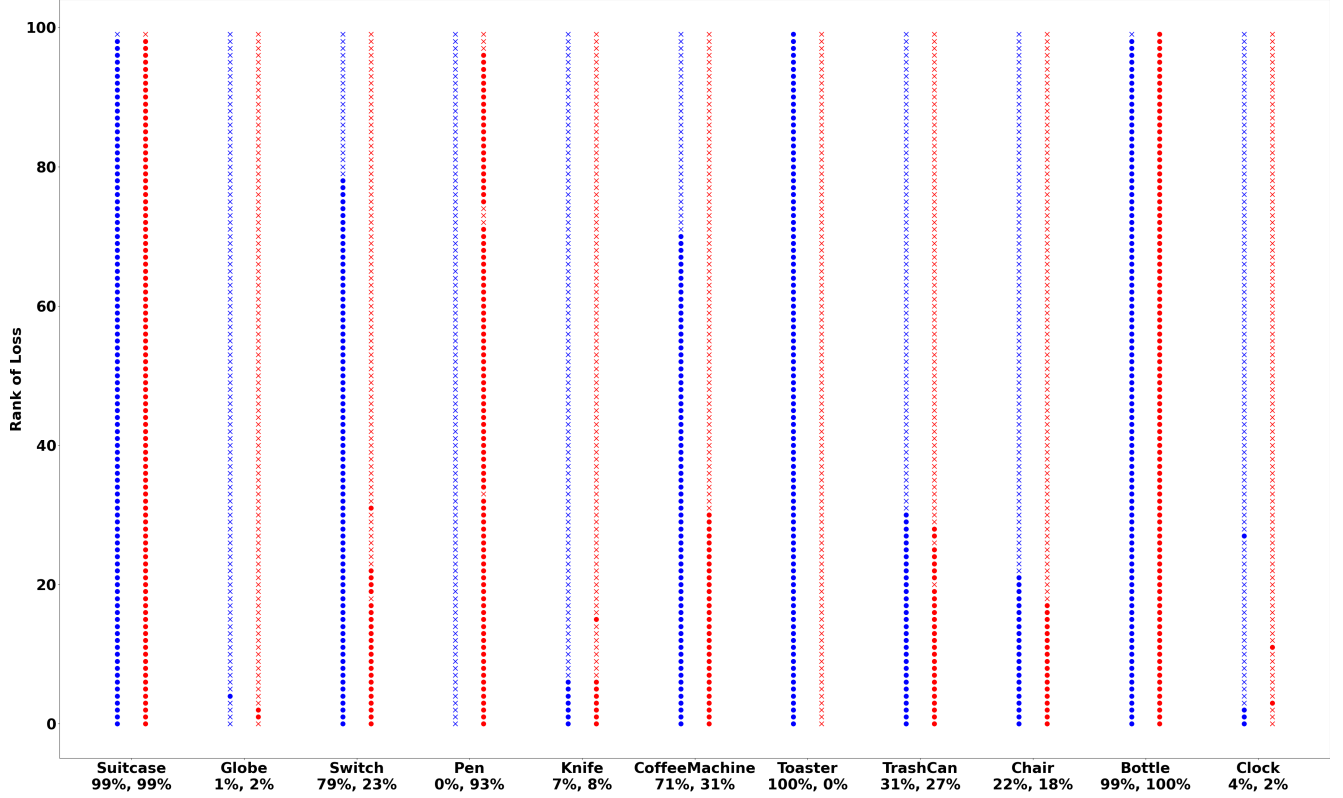

Figure 10. An analysis of the robustness of geometric consistency for articulation estimation. The horizontal axis represents different scenes, each with two columns for the two optimization formulations, where **blue** is used for optimization trials with mobile-only geometric consistency, and **red** for those with cross-mobile geometric consistency. The vertical axis represents the loss rank (lower is better). For each optimization trial, **●** denotes success, and **×** denotes failure. For each scene, the average success rates for both optimization formulations are shown under the scene name. Note that these success rates are the averages over the independent optimization trials and should not be confused with that of Stage 3(a) as a whole. We observe that successful trials **●** are often associated with lower losses than are failed trials **×**, and that both optimization formulations are necessary to ensure overall robustness (e.g., *pen* requires **cross-mobile geometric consistency**, while *toaster* requires **mobile-only geometric consistency**).

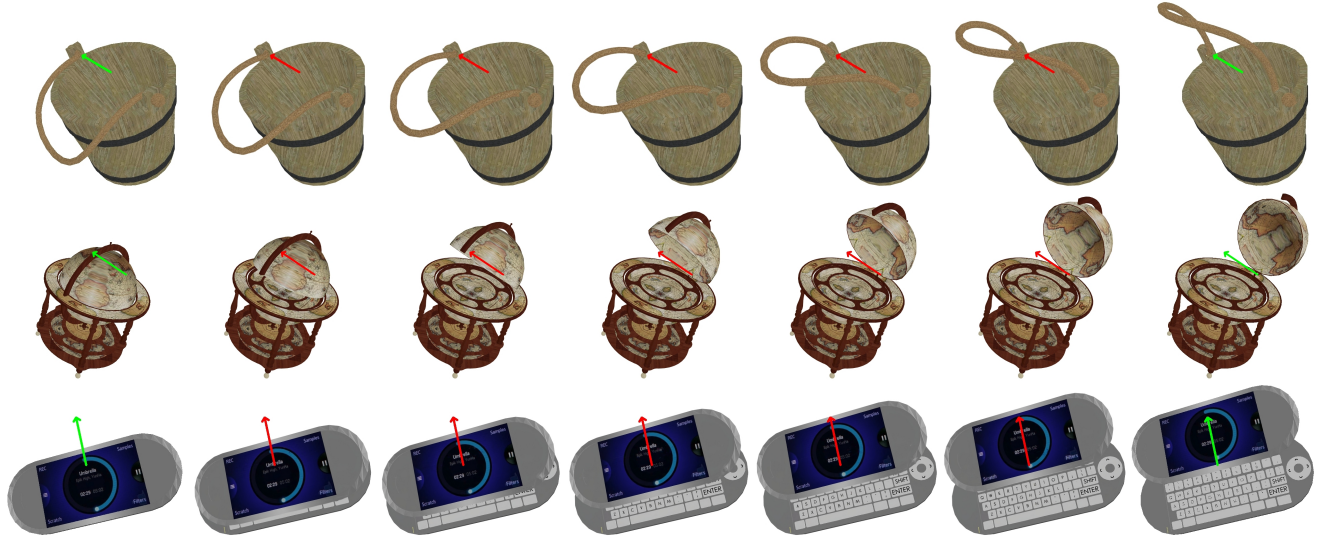

Figure 11. Additional visualizations of state interpolation for three objects along with their estimated articulation models. The left- and right-most images correspond to the ground-truth of the two end articulation states, annotated with the ground-truth articulation using [green arrows](#). The intermediate images are rendered results obtained by interpolating the articulation state, annotated with both the ground-truth articulation ([green arrows](#)) and the estimated articulation ([red arrows](#)). Due to the high accuracy of the articulation estimation, the ground-truth [green arrows](#) are hidden by the estimated [red arrows](#) in the interpolated images.

| Input States | Color |        |              | Part Segmentation |        |              |
|--------------|-------|--------|--------------|-------------------|--------|--------------|
|              | PARIS | SPLART | Ground-truth | PARIS             | SPLART | Ground-truth |
|              |       |        |              |                   |        |              |
|              |       |        |              |                   |        |              |
|              |       |        |              |                   |        |              |
|              |       |        |              |                   |        |              |

Figure 12. Additional qualitative comparisons of part-level reconstruction and articulation estimation.

| Type      | Scene          | Method         | Success Rate $\uparrow$ | $\text{err}_a$ $\downarrow$<br>( $\times 10^{-2}$ DEG) |                 | $\text{err}_p$ $\downarrow$<br>( $\times 10^{-3}$ ) |  | $\text{err}_t$ $\downarrow$<br>( $\times 10^{-2}$ DEG) |  | $\text{err}_l$ $\downarrow$<br>( $\times 10^{-3}$ ) |                  | $\text{CD}_s$ $\downarrow$<br>( $\times 10^{-3}$ ) |                    | $\text{CD}_m$ $\downarrow$<br>( $\times 10^{-3}$ ) |  | $\text{CD}_w$ $\downarrow$<br>( $\times 10^{-3}$ ) |  |
|-----------|----------------|----------------|-------------------------|--------------------------------------------------------|-----------------|-----------------------------------------------------|--|--------------------------------------------------------|--|-----------------------------------------------------|------------------|----------------------------------------------------|--------------------|----------------------------------------------------|--|----------------------------------------------------|--|
| Revolute  | USB            | PARIS          | 0/10                    | F                                                      |                 | F                                                   |  | F                                                      |  | N/A                                                 |                  | F                                                  |                    | F                                                  |  | F                                                  |  |
|           |                | DTA $^\dagger$ | 10/10                   | 9.30 $\pm$ 1.29                                        | 0.39 $\pm$ 0.31 | 14.81 $\pm$ 3.49                                    |  |                                                        |  |                                                     |                  | 2.62 $\pm$ 0.06                                    | 1.48 $\pm$ 0.03    | 1.36 $\pm$ 0.02                                    |  |                                                    |  |
|           |                | SPLART         | 10/10                   | 4.74 $\pm$ 0.32                                        | 0.26 $\pm$ 0.05 | 3.99 $\pm$ 0.26                                     |  |                                                        |  |                                                     |                  | 0.89 $\pm$ 0.08                                    | 0.83 $\pm$ 0.11    | 0.91 $\pm$ 0.03                                    |  |                                                    |  |
|           | foldchair      | PARIS          | 3/10                    | 103.68 $\pm$ 15.95                                     | 4.69 $\pm$ 4.77 | 195.70 $\pm$ 67.55                                  |  |                                                        |  |                                                     |                  | 0.45 $\pm$ 0.09                                    | 45.34 $\pm$ 4.62   | 14.85 $\pm$ 1.00                                   |  |                                                    |  |
|           |                | DTA $^\dagger$ | 10/10                   | 3.34 $\pm$ 1.43                                        | 0.50 $\pm$ 0.31 | 9.72 $\pm$ 3.61                                     |  |                                                        |  |                                                     |                  | 0.18 $\pm$ 0.00                                    | 0.14 $\pm$ 0.00    | 0.26 $\pm$ 0.00                                    |  |                                                    |  |
|           |                | SPLART         | 10/10                   | 5.47 $\pm$ 0.22                                        | 0.12 $\pm$ 0.03 | 8.93 $\pm$ 0.34                                     |  |                                                        |  |                                                     |                  | 1.53 $\pm$ 0.68                                    | 0.33 $\pm$ 0.01    | 0.31 $\pm$ 0.00                                    |  |                                                    |  |
|           | fridge         | PARIS          | 9/10                    | 105.51 $\pm$ 50.87                                     | 6.04 $\pm$ 4.17 | 121.25 $\pm$ 45.78                                  |  |                                                        |  |                                                     |                  | 2.97 $\pm$ 0.19                                    | 39.11 $\pm$ 2.07   | 11.62 $\pm$ 0.54                                   |  |                                                    |  |
|           |                | DTA $^\dagger$ | 10/10                   | 6.67 $\pm$ 2.79                                        | 0.51 $\pm$ 0.32 | 12.07 $\pm$ 2.08                                    |  |                                                        |  |                                                     |                  | 0.63 $\pm$ 0.01                                    | 0.29 $\pm$ 0.01    | 0.70 $\pm$ 0.00                                    |  |                                                    |  |
|           |                | SPLART         | 10/10                   | 4.14 $\pm$ 0.56                                        | 0.06 $\pm$ 0.05 | 5.81 $\pm$ 0.34                                     |  |                                                        |  |                                                     |                  | 2.23 $\pm$ 0.05                                    | 1.21 $\pm$ 0.03    | 1.95 $\pm$ 0.04                                    |  |                                                    |  |
|           | laptop         | PARIS          | 10/10                   | 117.26 $\pm$ 94.05                                     | 6.89 $\pm$ 5.45 | 99.11 $\pm$ 51.26                                   |  |                                                        |  |                                                     |                  | 0.61 $\pm$ 0.33                                    | 32.43 $\pm$ 2.19   | 15.08 $\pm$ 1.41                                   |  |                                                    |  |
|           |                | DTA $^\dagger$ | 10/10                   | 6.65 $\pm$ 1.73                                        | 1.33 $\pm$ 0.52 | 11.81 $\pm$ 3.62                                    |  |                                                        |  |                                                     |                  | 0.31 $\pm$ 0.00                                    | 0.14 $\pm$ 0.00    | 0.34 $\pm$ 0.00                                    |  |                                                    |  |
|           |                | SPLART         | 10/10                   | 3.20 $\pm$ 0.55                                        | 0.59 $\pm$ 0.05 | 4.89 $\pm$ 0.28                                     |  |                                                        |  |                                                     |                  | 0.24 $\pm$ 0.00                                    | 0.34 $\pm$ 0.01    | 0.35 $\pm$ 0.01                                    |  |                                                    |  |
|           | oven           | PARIS          | 10/10                   | 161.16 $\pm$ 112.94                                    | 3.44 $\pm$ 3.81 | 95.15 $\pm$ 55.90                                   |  |                                                        |  |                                                     |                  | 9.89 $\pm$ 0.93                                    | 156.89 $\pm$ 43.24 | 10.90 $\pm$ 1.70                                   |  |                                                    |  |
|           |                | DTA $^\dagger$ | 10/10                   | 19.35 $\pm$ 4.10                                       | 1.57 $\pm$ 0.60 | 11.03 $\pm$ 2.19                                    |  |                                                        |  |                                                     |                  | 4.61 $\pm$ 0.07                                    | 0.44 $\pm$ 0.01    | 4.26 $\pm$ 0.06                                    |  |                                                    |  |
|           |                | SPLART         | 10/10                   | 1.45 $\pm$ 0.32                                        | 0.90 $\pm$ 0.06 | 2.95 $\pm$ 0.27                                     |  |                                                        |  |                                                     |                  | 7.10 $\pm$ 0.44                                    | 1.89 $\pm$ 3.52    | 6.02 $\pm$ 0.32                                    |  |                                                    |  |
|           | scissor        | PARIS          | 0/10                    | F                                                      |                 | F                                                   |  | F                                                      |  | N/A                                                 |                  | F                                                  |                    | F                                                  |  | F                                                  |  |
|           |                | DTA $^\dagger$ | 10/10                   | 7.28 $\pm$ 5.05                                        | 4.84 $\pm$ 7.66 | 56.56 $\pm$ 95.23                                   |  |                                                        |  |                                                     |                  | 1.67 $\pm$ 3.41                                    | 5.06 $\pm$ 13.99   | 0.42 $\pm$ 0.00                                    |  |                                                    |  |
|           |                | SPLART         | 10/10                   | 2.24 $\pm$ 0.17                                        | 0.24 $\pm$ 0.06 | 2.18 $\pm$ 0.26                                     |  |                                                        |  |                                                     |                  | 0.37 $\pm$ 0.01                                    | 0.20 $\pm$ 0.01    | 0.25 $\pm$ 0.00                                    |  |                                                    |  |
|           | stapler        | PARIS          | 0/10                    | F                                                      |                 | F                                                   |  | F                                                      |  | N/A                                                 |                  | F                                                  |                    | F                                                  |  | F                                                  |  |
|           |                | DTA $^\dagger$ | 9/10                    | 7.06 $\pm$ 5.68                                        | 1.81 $\pm$ 1.16 | 11.76 $\pm$ 11.74                                   |  |                                                        |  |                                                     |                  | 2.93 $\pm$ 0.24                                    | 2.16 $\pm$ 0.89    | 2.03 $\pm$ 0.03                                    |  |                                                    |  |
|           |                | SPLART         | 10/10                   | 4.64 $\pm$ 0.43                                        | 0.75 $\pm$ 0.08 | 4.09 $\pm$ 0.28                                     |  |                                                        |  |                                                     |                  | 1.17 $\pm$ 0.02                                    | 2.12 $\pm$ 0.14    | 1.05 $\pm$ 0.02                                    |  |                                                    |  |
|           | washer         | PARIS          | 0/10                    | F                                                      |                 | F                                                   |  | F                                                      |  | N/A                                                 |                  | F                                                  |                    | F                                                  |  | F                                                  |  |
|           |                | DTA $^\dagger$ | 10/10                   | 38.95 $\pm$ 11.24                                      | 3.91 $\pm$ 2.63 | 27.51 $\pm$ 8.30                                    |  |                                                        |  |                                                     |                  | 4.68 $\pm$ 0.11                                    | 0.40 $\pm$ 0.01    | 4.46 $\pm$ 0.12                                    |  |                                                    |  |
|           |                | SPLART         | 10/10                   | 3.76 $\pm$ 0.48                                        | 0.24 $\pm$ 0.15 | 5.95 $\pm$ 0.67                                     |  |                                                        |  |                                                     |                  | 19.14 $\pm$ 1.27                                   | 1.59 $\pm$ 2.40    | 17.92 $\pm$ 1.22                                   |  |                                                    |  |
|           | mean           | PARIS          | 40.0%                   | 121.90 $\pm$ 68.45                                     | 5.27 $\pm$ 4.55 | 127.80 $\pm$ 55.12                                  |  |                                                        |  |                                                     |                  | 3.48 $\pm$ 0.39                                    | 68.44 $\pm$ 13.03  | 13.11 $\pm$ 1.16                                   |  |                                                    |  |
|           |                | DTA $^\dagger$ | 98.8%                   | 12.32 $\pm$ 4.16                                       | 1.86 $\pm$ 1.69 | 19.41 $\pm$ 16.28                                   |  |                                                        |  |                                                     |                  | 2.20 $\pm$ 0.49                                    | 1.27 $\pm$ 1.87    | 1.73 $\pm$ 0.03                                    |  |                                                    |  |
|           |                | SPLART         | 100.0%                  | 3.70 $\pm$ 0.38                                        | 0.40 $\pm$ 0.07 | 4.85 $\pm$ 0.33                                     |  |                                                        |  |                                                     |                  | 4.08 $\pm$ 0.32                                    | 1.06 $\pm$ 0.78    | 3.59 $\pm$ 0.21                                    |  |                                                    |  |
| Prismatic | blade          | PARIS          | 0/10                    | F                                                      |                 | N/A                                                 |  | N/A                                                    |  | F                                                   |                  | F                                                  |                    | F                                                  |  | F                                                  |  |
|           |                | DTA $^\dagger$ | 10/10                   | 25.72 $\pm$ 4.58                                       | N/A             | N/A                                                 |  |                                                        |  | 0.94 $\pm$ 0.14                                     | 0.49 $\pm$ 0.01  | 31.11 $\pm$ 0.55                                   | 0.37 $\pm$ 0.01    |                                                    |  |                                                    |  |
|           |                | SPLART         | 9/10                    | 2.04 $\pm$ 0.61                                        | N/A             | N/A                                                 |  |                                                        |  | 0.22 $\pm$ 0.04                                     | 0.44 $\pm$ 0.01  | 26.60 $\pm$ 0.85                                   | 0.44 $\pm$ 0.01    |                                                    |  |                                                    |  |
|           | storage        | PARIS          | 10/10                   | 27.97 $\pm$ 13.09                                      | N/A             | N/A                                                 |  |                                                        |  | 4.28 $\pm$ 3.02                                     | 9.21 $\pm$ 1.94  | 151.78 $\pm$ 35.00                                 | 7.99 $\pm$ 0.49    |                                                    |  |                                                    |  |
|           |                | DTA $^\dagger$ | 10/10                   | 6.79 $\pm$ 2.50                                        | N/A             | N/A                                                 |  |                                                        |  | 1.37 $\pm$ 0.13                                     | 4.88 $\pm$ 0.07  | 0.36 $\pm$ 0.00                                    | 4.07 $\pm$ 0.06    |                                                    |  |                                                    |  |
|           |                | SPLART         | 10/10                   | 2.69 $\pm$ 0.26                                        | N/A             | N/A                                                 |  |                                                        |  | 0.45 $\pm$ 0.04                                     | 11.60 $\pm$ 0.38 | 6.94 $\pm$ 1.43                                    | 6.94 $\pm$ 0.27    |                                                    |  |                                                    |  |
|           | mean           | PARIS          | 50.0%                   | 27.97 $\pm$ 13.09                                      | N/A             | N/A                                                 |  |                                                        |  | 4.28 $\pm$ 3.02                                     | 9.21 $\pm$ 1.94  | 151.78 $\pm$ 35.00                                 | 7.99 $\pm$ 0.49    |                                                    |  |                                                    |  |
|           |                | DTA $^\dagger$ | 100.0%                  | 16.26 $\pm$ 3.54                                       | N/A             | N/A                                                 |  |                                                        |  | 1.15 $\pm$ 0.14                                     | 2.69 $\pm$ 0.04  | 15.74 $\pm$ 0.28                                   | 2.22 $\pm$ 0.03    |                                                    |  |                                                    |  |
|           |                | SPLART         | 95.0%                   | 2.36 $\pm$ 0.44                                        | N/A             | N/A                                                 |  |                                                        |  | 0.33 $\pm$ 0.04                                     | 6.02 $\pm$ 0.20  | 16.77 $\pm$ 1.14                                   | 3.69 $\pm$ 0.14    |                                                    |  |                                                    |  |
| Overall   | PARIS          |                | 42.0%                   | 103.12 $\pm$ 57.38                                     | 5.27 $\pm$ 4.55 | 127.80 $\pm$ 55.12                                  |  |                                                        |  | 4.28 $\pm$ 3.02                                     | 4.63 $\pm$ 0.70  | 85.11 $\pm$ 17.42                                  | 12.09 $\pm$ 1.03   |                                                    |  |                                                    |  |
|           | DTA $^\dagger$ |                | 99.0%                   | 13.11 $\pm$ 4.04                                       | 1.86 $\pm$ 1.69 | 19.41 $\pm$ 16.28                                   |  |                                                        |  | 1.15 $\pm$ 0.14                                     | 2.30 $\pm$ 0.40  | 4.16 $\pm$ 1.55                                    | 1.83 $\pm$ 0.03    |                                                    |  |                                                    |  |
|           | SPLART         |                | 99.0%                   | 3.44 $\pm$ 0.39                                        | 0.40 $\pm$ 0.07 | 4.85 $\pm$ 0.33                                     |  |                                                        |  | 0.33 $\pm$ 0.04                                     | 4.47 $\pm$ 0.30  | 4.20 $\pm$ 0.85                                    | 3.61 $\pm$ 0.19    |                                                    |  |                                                    |  |

Table 5. PARIS-PMS Articulation and Mesh Reconstruction Metrics.  $^\dagger$ DTA requires ground-truth depth.

| Type      | Scene     | Method           | PSNR $\uparrow$ | SSIM $\uparrow$ | LPIPS $\downarrow$ | Depth MAE $\downarrow$ | IoU <sub>s</sub> $\uparrow$ | IoU <sub>m</sub> $\uparrow$ | IoU <sub>bg</sub> $\uparrow$ | mIoU $\uparrow$ |
|-----------|-----------|------------------|-----------------|-----------------|--------------------|------------------------|-----------------------------|-----------------------------|------------------------------|-----------------|
| Revolute  | USB       | PARIS            | F               | F               | F                  | F                      | F                           | F                           | F                            | F               |
|           |           | DTA <sup>†</sup> | N/A             | N/A             | N/A                | 0.022                  | 0.864                       | 0.892                       | 0.996                        | 0.917           |
|           |           | SPLART           | 45.70           | 0.996           | 0.0029             | 0.026                  | 0.982                       | 0.979                       | 1.000                        | 0.987           |
|           | foldchair | PARIS            | 33.48           | 0.936           | 0.0844             | 0.096                  | 0.961                       | 0.939                       | 0.994                        | 0.965           |
|           |           | DTA <sup>†</sup> | N/A             | N/A             | N/A                | 0.041                  | 0.915                       | 0.950                       | 0.988                        | 0.951           |
|           |           | SPLART           | 43.98           | 0.992           | 0.0119             | 0.037                  | 0.981                       | 0.980                       | 0.999                        | 0.987           |
|           | fridge    | PARIS            | 32.22           | 0.967           | 0.0766             | 0.087                  | 0.973                       | 0.866                       | 0.997                        | 0.945           |
|           |           | DTA <sup>†</sup> | N/A             | N/A             | N/A                | 0.034                  | 0.957                       | 0.823                       | 0.992                        | 0.924           |
|           |           | SPLART           | 41.40           | 0.996           | 0.0101             | 0.045                  | 0.986                       | 0.917                       | 0.999                        | 0.967           |
|           | laptop    | PARIS            | 31.64           | 0.964           | 0.0758             | 0.057                  | 0.907                       | 0.959                       | 0.997                        | 0.954           |
|           |           | DTA <sup>†</sup> | N/A             | N/A             | N/A                | 0.014                  | 0.938                       | 0.964                       | 0.997                        | 0.966           |
|           |           | SPLART           | 40.90           | 0.995           | 0.0096             | 0.026                  | 0.931                       | 0.975                       | 0.999                        | 0.968           |
|           | oven      | PARIS            | 31.48           | 0.950           | 0.1048             | 0.132                  | 0.977                       | 0.891                       | 0.996                        | 0.955           |
|           |           | DTA <sup>†</sup> | N/A             | N/A             | N/A                | 0.038                  | 0.981                       | 0.946                       | 0.993                        | 0.973           |
|           |           | SPLART           | 41.59           | 0.993           | 0.0148             | 0.082                  | 0.990                       | 0.935                       | 0.999                        | 0.974           |
|           | scissor   | PARIS            | F               | F               | F                  | F                      | F                           | F                           | F                            | F               |
|           |           | DTA <sup>†</sup> | N/A             | N/A             | N/A                | 0.051                  | 0.863                       | 0.876                       | 0.991                        | 0.910           |
|           |           | SPLART           | 46.15           | 0.996           | 0.0030             | 0.044                  | 0.951                       | 0.954                       | 0.999                        | 0.968           |
|           | stapler   | PARIS            | F               | F               | F                  | F                      | F                           | F                           | F                            | F               |
|           |           | DTA <sup>†</sup> | N/A             | N/A             | N/A                | 0.035                  | 0.902                       | 0.894                       | 0.994                        | 0.930           |
|           |           | SPLART           | 44.81           | 0.994           | 0.0021             | 0.034                  | 0.959                       | 0.940                       | 1.000                        | 0.966           |
|           | washer    | PARIS            | F               | F               | F                  | F                      | F                           | F                           | F                            | F               |
|           |           | DTA <sup>†</sup> | N/A             | N/A             | N/A                | 0.016                  | 0.991                       | 0.888                       | 0.998                        | 0.959           |
|           |           | SPLART           | 43.75           | 0.996           | 0.0079             | 0.131                  | 0.995                       | 0.930                       | 0.999                        | 0.975           |
|           | mean      | PARIS            | 32.21           | 0.954           | 0.0854             | 0.093                  | 0.954                       | 0.914                       | 0.996                        | 0.955           |
|           |           | DTA <sup>†</sup> | N/A             | N/A             | N/A                | 0.031                  | 0.926                       | 0.904                       | 0.994                        | 0.941           |
|           |           | SPLART           | 43.53           | 0.995           | 0.0078             | 0.053                  | 0.972                       | 0.951                       | 0.999                        | 0.974           |
| Prismatic | blade     | PARIS            | F               | F               | F                  | F                      | F                           | F                           | F                            | F               |
|           |           | DTA <sup>†</sup> | N/A             | N/A             | N/A                | 0.116                  | 0.728                       | 0.416                       | 0.998                        | 0.714           |
|           |           | SPLART           | 46.15           | 0.998           | 0.0016             | 0.052                  | 0.900                       | 0.657                       | 1.000                        | 0.852           |
|           | storage   | PARIS            | 33.75           | 0.944           | 0.1228             | 0.108                  | 0.954                       | 0.722                       | 0.996                        | 0.891           |
|           |           | DTA <sup>†</sup> | N/A             | N/A             | N/A                | 0.017                  | 0.984                       | 0.944                       | 0.997                        | 0.975           |
|           |           | SPLART           | 42.62           | 0.985           | 0.0481             | 0.037                  | 0.951                       | 0.850                       | 0.999                        | 0.933           |
|           | mean      | PARIS            | 33.75           | 0.944           | 0.1228             | 0.108                  | 0.954                       | 0.722                       | 0.996                        | 0.891           |
|           |           | DTA <sup>†</sup> | N/A             | N/A             | N/A                | 0.066                  | 0.856                       | 0.680                       | 0.997                        | 0.844           |
|           |           | SPLART           | 44.38           | 0.991           | 0.0248             | 0.044                  | 0.925                       | 0.754                       | 0.999                        | 0.893           |
| Overall   |           | PARIS            | 32.52           | 0.952           | 0.0929             | 0.096                  | 0.954                       | 0.875                       | 0.996                        | 0.942           |
|           |           | DTA <sup>†</sup> | N/A             | N/A             | N/A                | 0.038                  | 0.912                       | 0.859                       | 0.994                        | 0.922           |
|           |           | SPLART           | 43.70           | 0.994           | 0.0112             | 0.052                  | 0.963                       | 0.912                       | 0.999                        | 0.958           |

Table 6. PARIS-PMS Novel View Synthesis Metrics. <sup>†</sup>DTA requires ground-truth depth.

| Scene                   | Method           | Success Rate $\uparrow$ | $\text{err}_a$<br>( $\times 10^{-2}$ DEG) $\downarrow$ | $\text{err}_p$<br>( $\times 10^{-3}$ ) $\downarrow$ | $\text{err}_r$<br>( $\times 10^{-2}$ DEG) $\downarrow$ |
|-------------------------|------------------|-------------------------|--------------------------------------------------------|-----------------------------------------------------|--------------------------------------------------------|
| 2230<br>Chair           | PARIS            | 1/10                    | 44.97 $\pm$ 0.00                                       | 4.41 $\pm$ 0.00                                     | 130.66 $\pm$ 0.00                                      |
|                         | DTA <sup>†</sup> | 9/10                    | 2.77 $\pm$ 0.79                                        | 0.18 $\pm$ 0.14                                     | 5.62 $\pm$ 2.35                                        |
|                         | SPLART           | 10/10                   | 0.33 $\pm$ 0.13                                        | 0.06 $\pm$ 0.03                                     | 0.84 $\pm$ 0.36                                        |
| 5477<br>Display         | PARIS            | 8/10                    | 86.76 $\pm$ 27.41                                      | 3.42 $\pm$ 3.21                                     | 133.12 $\pm$ 43.26                                     |
|                         | DTA <sup>†</sup> | 10/10                   | 1.38 $\pm$ 0.39                                        | 0.27 $\pm$ 0.06                                     | 2.29 $\pm$ 0.55                                        |
|                         | SPLART           | 10/10                   | 1.91 $\pm$ 0.43                                        | 0.49 $\pm$ 0.25                                     | 4.10 $\pm$ 0.75                                        |
| 7054<br>Clock           | PARIS            | 0/10                    | F                                                      | F                                                   | F                                                      |
|                         | DTA <sup>†</sup> | 0/10                    | F                                                      | F                                                   | F                                                      |
|                         | SPLART           | 1/10                    | 211.22 $\pm$ 0.00                                      | 1.06 $\pm$ 0.00                                     | 390.40 $\pm$ 0.00                                      |
| 11951<br>TrashCan       | PARIS            | 0/10                    | F                                                      | F                                                   | F                                                      |
|                         | DTA <sup>†</sup> | 0/10                    | F                                                      | F                                                   | F                                                      |
|                         | SPLART           | 10/10                   | 1.65 $\pm$ 0.71                                        | 21.55 $\pm$ 16.33                                   | 473.55 $\pm$ 352.80                                    |
| 100247<br>Box           | PARIS            | 0/10                    | F                                                      | F                                                   | F                                                      |
|                         | DTA <sup>†</sup> | 0/10                    | F                                                      | F                                                   | F                                                      |
|                         | SPLART           | 8/10                    | 0.79 $\pm$ 0.31                                        | 0.14 $\pm$ 0.10                                     | 1.99 $\pm$ 0.67                                        |
| 100460<br>Bucket        | PARIS            | 0/10                    | F                                                      | F                                                   | F                                                      |
|                         | DTA <sup>†</sup> | 10/10                   | 15.09 $\pm$ 6.89                                       | 0.61 $\pm$ 0.34                                     | 24.57 $\pm$ 10.06                                      |
|                         | SPLART           | 10/10                   | 0.50 $\pm$ 0.23                                        | 0.03 $\pm$ 0.04                                     | 0.79 $\pm$ 0.36                                        |
| 100756<br>Globe         | PARIS            | 0/10                    | F                                                      | F                                                   | F                                                      |
|                         | DTA <sup>†</sup> | 0/10                    | F                                                      | F                                                   | F                                                      |
|                         | SPLART           | 1/10                    | 0.72 $\pm$ 0.00                                        | 0.09 $\pm$ 0.00                                     | 3.31 $\pm$ 0.00                                        |
| 100794<br>Globe         | PARIS            | 1/10                    | 126.06 $\pm$ 0.00                                      | 14.17 $\pm$ 0.00                                    | 533.60 $\pm$ 0.00                                      |
|                         | DTA <sup>†</sup> | 10/10                   | 4.59 $\pm$ 3.84                                        | 2.67 $\pm$ 1.39                                     | 108.22 $\pm$ 10.35                                     |
|                         | SPLART           | 10/10                   | 1.22 $\pm$ 0.35                                        | 0.12 $\pm$ 0.10                                     | 2.09 $\pm$ 0.50                                        |
| 100882<br>Switch        | PARIS            | 2/10                    | 393.07 $\pm$ 86.79                                     | 15.78 $\pm$ 4.03                                    | 342.44 $\pm$ 171.13                                    |
|                         | DTA <sup>†</sup> | 1/10                    | 139.96 $\pm$ 0.00                                      | 2.67 $\pm$ 0.00                                     | 63.28 $\pm$ 0.00                                       |
|                         | SPLART           | 10/10                   | 19.37 $\pm$ 1.29                                       | 0.62 $\pm$ 0.23                                     | 11.20 $\pm$ 0.61                                       |
| 101542<br>Dispenser     | PARIS            | 7/10                    | 71.74 $\pm$ 49.72                                      | 5.44 $\pm$ 6.19                                     | 251.86 $\pm$ 267.19                                    |
|                         | DTA <sup>†</sup> | 0/10                    | F                                                      | F                                                   | F                                                      |
|                         | SPLART           | 8/10                    | 0.75 $\pm$ 0.43                                        | 0.19 $\pm$ 0.06                                     | 11.48 $\pm$ 0.70                                       |
| 102400<br>Knife         | PARIS            | 0/10                    | F                                                      | F                                                   | F                                                      |
|                         | DTA <sup>†</sup> | 0/10                    | F                                                      | F                                                   | F                                                      |
|                         | SPLART           | 5/10                    | 9.01 $\pm$ 5.46                                        | 22.59 $\pm$ 11.58                                   | 37.95 $\pm$ 15.46                                      |
| 103031<br>CoffeeMachine | PARIS            | 3/10                    | 281.43 $\pm$ 90.89                                     | 12.95 $\pm$ 8.94                                    | 230.56 $\pm$ 65.56                                     |
|                         | DTA <sup>†</sup> | 0/10                    | F                                                      | F                                                   | F                                                      |
|                         | SPLART           | 10/10                   | 1.69 $\pm$ 0.40                                        | 0.22 $\pm$ 0.14                                     | 1.98 $\pm$ 0.58                                        |
| mean                    | PARIS            | 18.3%                   | 167.34 $\pm$ 42.47                                     | 9.36 $\pm$ 3.73                                     | 270.37 $\pm$ 91.19                                     |
|                         | DTA <sup>†</sup> | 33.3%                   | 32.76 $\pm$ 2.38                                       | 1.28 $\pm$ 0.39                                     | 40.80 $\pm$ 4.66                                       |
|                         | SPLART           | 77.5%                   | 20.76 $\pm$ 0.81                                       | 3.93 $\pm$ 2.41                                     | 78.31 $\pm$ 31.06                                      |

Table 7. SPLART-PMS Articulation Metrics on Revolute Scenes. <sup>†</sup>DTA requires ground-truth depth.

| Scene               | Method           | Success Rate $\uparrow$ | $\text{err}_a$<br>( $\times 10^{-2}$ DEG) $\downarrow$ |        | $\text{err}_t$<br>( $\times 10^{-3}$ ) $\downarrow$ |       |
|---------------------|------------------|-------------------------|--------------------------------------------------------|--------|-----------------------------------------------------|-------|
| 3558<br>Bottle      | PARIS            | 5/10                    | 45.83 $\pm$                                            | 22.38  | 23.32 $\pm$                                         | 12.29 |
|                     | DTA <sup>†</sup> | 10/10                   | 200.52 $\pm$                                           | 10.32  | 4.60 $\pm$                                          | 0.27  |
|                     | SPLART           | 10/10                   | 3.82 $\pm$                                             | 0.52   | 0.10 $\pm$                                          | 0.02  |
| 12085<br>Dishwasher | PARIS            | 6/10                    | 15.60 $\pm$                                            | 7.00   | 4.67 $\pm$                                          | 1.10  |
|                     | DTA <sup>†</sup> | 10/10                   | 3.78 $\pm$                                             | 1.96   | 2.46 $\pm$                                          | 0.18  |
|                     | SPLART           | 10/10                   | 1.00 $\pm$                                             | 0.14   | 0.24 $\pm$                                          | 0.02  |
| 27189<br>Table      | PARIS            | 3/10                    | 23.69 $\pm$                                            | 10.43  | 21.18 $\pm$                                         | 3.03  |
|                     | DTA <sup>†</sup> | 10/10                   | 15.90 $\pm$                                            | 2.43   | 2.69 $\pm$                                          | 0.45  |
|                     | SPLART           | 10/10                   | 0.14 $\pm$                                             | 0.05   | 0.14 $\pm$                                          | 0.01  |
| 100248<br>Suitcase  | PARIS            | 0/10                    | F                                                      |        | F                                                   |       |
|                     | DTA <sup>†</sup> | 10/10                   | 192.55 $\pm$                                           | 30.46  | 10.57 $\pm$                                         | 1.60  |
|                     | SPLART           | 10/10                   | 1.22 $\pm$                                             | 0.58   | 0.10 $\pm$                                          | 0.04  |
| 101713<br>Pen       | PARIS            | 0/10                    | F                                                      |        | F                                                   |       |
|                     | DTA <sup>†</sup> | 10/10                   | 179.16 $\pm$                                           | 51.33  | 3.76 $\pm$                                          | 1.04  |
|                     | SPLART           | 10/10                   | 244.39 $\pm$                                           | 172.86 | 7.96 $\pm$                                          | 2.71  |
| 102016<br>USB       | PARIS            | 2/10                    | 17.52 $\pm$                                            | 10.01  | 9.53 $\pm$                                          | 1.87  |
|                     | DTA <sup>†</sup> | 10/10                   | 44.11 $\pm$                                            | 5.59   | 7.34 $\pm$                                          | 0.69  |
|                     | SPLART           | 10/10                   | 0.71 $\pm$                                             | 0.33   | 0.49 $\pm$                                          | 0.09  |
| 102812<br>Switch    | PARIS            | 8/10                    | 34.54 $\pm$                                            | 18.03  | 9.04 $\pm$                                          | 6.90  |
|                     | DTA <sup>†</sup> | 10/10                   | 190.87 $\pm$                                           | 8.20   | 38.68 $\pm$                                         | 1.85  |
|                     | SPLART           | 10/10                   | 1.55 $\pm$                                             | 0.80   | 0.11 $\pm$                                          | 0.05  |
| 103042<br>Window    | PARIS            | 5/10                    | 189.87 $\pm$                                           | 54.52  | 30.48 $\pm$                                         | 9.55  |
|                     | DTA <sup>†</sup> | 10/10                   | 92.93 $\pm$                                            | 1.64   | 11.92 $\pm$                                         | 0.23  |
|                     | SPLART           | 10/10                   | 1.55 $\pm$                                             | 0.24   | 0.76 $\pm$                                          | 0.18  |
| 103549<br>Toaster   | PARIS            | 0/10                    | F                                                      |        | F                                                   |       |
|                     | DTA <sup>†</sup> | 0/10                    | F                                                      |        | F                                                   |       |
|                     | SPLART           | 5/10                    | 2.63 $\pm$                                             | 0.74   | 0.30 $\pm$                                          | 0.07  |
| 103941<br>Phone     | PARIS            | 10/10                   | 19.39 $\pm$                                            | 10.07  | 6.51 $\pm$                                          | 3.81  |
|                     | DTA <sup>†</sup> | 10/10                   | 5.06 $\pm$                                             | 0.42   | 1.28 $\pm$                                          | 0.28  |
|                     | SPLART           | 10/10                   | 0.18 $\pm$                                             | 0.09   | 0.20 $\pm$                                          | 0.03  |
| mean                | PARIS            | 39.0%                   | 49.49 $\pm$                                            | 18.92  | 14.96 $\pm$                                         | 5.51  |
|                     | DTA <sup>†</sup> | 90.0%                   | 102.77 $\pm$                                           | 12.48  | 9.25 $\pm$                                          | 0.73  |
|                     | SPLART           | 95.0%                   | 25.72 $\pm$                                            | 17.63  | 1.04 $\pm$                                          | 0.32  |

Table 8. SPLART-PMS Articulation Metrics on Prismatic Scenes. <sup>†</sup>DTA requires ground-truth depth.



| Scene                   | Method           | PSNR $\uparrow$ | SSIM $\uparrow$ | LPIPS $\downarrow$ | Depth MAE $\downarrow$ | IoU <sub>s</sub> $\uparrow$ | IoU <sub>m</sub> $\uparrow$ | IoU <sub>bg</sub> $\uparrow$ | mIoU $\uparrow$ |
|-------------------------|------------------|-----------------|-----------------|--------------------|------------------------|-----------------------------|-----------------------------|------------------------------|-----------------|
| 2230<br>Chair           | PARIS            | 28.89           | 0.924           | 0.1004             | 0.231                  | 0.510                       | 0.737                       | 0.982                        | 0.743           |
|                         | DTA <sup>†</sup> | N/A             | N/A             | N/A                | 0.098                  | 0.764                       | 0.857                       | 0.980                        | 0.867           |
|                         | SPLART           | 32.08           | 0.972           | 0.0392             | 0.027                  | 0.498                       | 0.791                       | 0.993                        | 0.761           |
| 5477<br>Display         | PARIS            | 34.34           | 0.943           | 0.0979             | 0.100                  | 0.933                       | 0.973                       | 0.997                        | 0.968           |
|                         | DTA <sup>†</sup> | N/A             | N/A             | N/A                | 0.020                  | 0.783                       | 0.968                       | 0.996                        | 0.916           |
|                         | SPLART           | 38.33           | 0.970           | 0.0379             | 0.020                  | 0.804                       | 0.971                       | 0.999                        | 0.924           |
| 7054<br>Clock           | PARIS            | F               | F               | F                  | F                      | F                           | F                           | F                            | F               |
|                         | DTA <sup>†</sup> | F               | F               | F                  | F                      | F                           | F                           | F                            | F               |
|                         | SPLART           | 35.54           | 0.985           | 0.0187             | 0.027                  | 0.994                       | 0.811                       | 0.999                        | 0.935           |
| 11951<br>TrashCan       | PARIS            | F               | F               | F                  | F                      | F                           | F                           | F                            | F               |
|                         | DTA <sup>†</sup> | F               | F               | F                  | F                      | F                           | F                           | F                            | F               |
|                         | SPLART           | 30.01           | 0.952           | 0.0560             | 0.083                  | 0.920                       | 0.735                       | 0.980                        | 0.878           |
| 100247<br>Box           | PARIS            | F               | F               | F                  | F                      | F                           | F                           | F                            | F               |
|                         | DTA <sup>†</sup> | F               | F               | F                  | F                      | F                           | F                           | F                            | F               |
|                         | SPLART           | 36.96           | 0.968           | 0.0409             | 0.030                  | 0.989                       | 0.987                       | 0.999                        | 0.992           |
| 100460<br>Bucket        | PARIS            | F               | F               | F                  | F                      | F                           | F                           | F                            | F               |
|                         | DTA <sup>†</sup> | N/A             | N/A             | N/A                | 0.081                  | 0.948                       | 0.455                       | 0.984                        | 0.795           |
|                         | SPLART           | 37.83           | 0.970           | 0.0397             | 0.016                  | 0.989                       | 0.832                       | 0.999                        | 0.940           |
| 100756<br>Globe         | PARIS            | F               | F               | F                  | F                      | F                           | F                           | F                            | F               |
|                         | DTA <sup>†</sup> | F               | F               | F                  | F                      | F                           | F                           | F                            | F               |
|                         | SPLART           | 36.30           | 0.990           | 0.0346             | 0.035                  | 0.577                       | 0.346                       | 0.997                        | 0.640           |
| 100794<br>Globe         | PARIS            | 29.45           | 0.915           | 0.0965             | 0.115                  | 0.974                       | 0.937                       | 0.996                        | 0.969           |
|                         | DTA <sup>†</sup> | N/A             | N/A             | N/A                | 0.046                  | 0.961                       | 0.943                       | 0.994                        | 0.966           |
|                         | SPLART           | 35.47           | 0.980           | 0.0216             | 0.012                  | 0.989                       | 0.985                       | 0.999                        | 0.991           |
| 100882<br>Switch        | PARIS            | 40.23           | 0.991           | 0.0418             | 0.082                  | 0.989                       | 0.822                       | 0.999                        | 0.937           |
|                         | DTA <sup>†</sup> | N/A             | N/A             | N/A                | 0.020                  | 0.976                       | 0.676                       | 0.998                        | 0.883           |
|                         | SPLART           | 44.04           | 0.997           | 0.0174             | 0.033                  | 0.990                       | 0.835                       | 0.999                        | 0.941           |
| 101542<br>Dispenser     | PARIS            | 31.32           | 0.966           | 0.0450             | 0.105                  | 0.883                       | 0.623                       | 0.998                        | 0.835           |
|                         | DTA <sup>†</sup> | F               | F               | F                  | F                      | F                           | F                           | F                            | F               |
|                         | SPLART           | 36.53           | 0.992           | 0.0153             | 0.020                  | 0.869                       | 0.585                       | 0.999                        | 0.818           |
| 102400<br>Knife         | PARIS            | F               | F               | F                  | F                      | F                           | F                           | F                            | F               |
|                         | DTA <sup>†</sup> | F               | F               | F                  | F                      | F                           | F                           | F                            | F               |
|                         | SPLART           | 36.21           | 0.990           | 0.0215             | 0.041                  | 0.986                       | 0.874                       | 0.997                        | 0.952           |
| 103031<br>CoffeeMachine | PARIS            | 32.29           | 0.979           | 0.0659             | 0.116                  | 0.977                       | 0.825                       | 0.997                        | 0.933           |
|                         | DTA <sup>†</sup> | F               | F               | F                  | F                      | F                           | F                           | F                            | F               |
|                         | SPLART           | 37.20           | 0.993           | 0.0284             | 0.034                  | 0.994                       | 0.975                       | 0.999                        | 0.990           |
| mean                    | PARIS            | 32.75           | 0.953           | 0.0746             | 0.125                  | 0.878                       | 0.820                       | 0.995                        | 0.897           |
|                         | DTA <sup>†</sup> | N/A             | N/A             | N/A                | 0.053                  | 0.886                       | 0.780                       | 0.990                        | 0.886           |
|                         | SPLART           | 36.38           | 0.980           | 0.0309             | 0.032                  | 0.883                       | 0.811                       | 0.997                        | 0.897           |

Table 9. SPLART-PMS Novel View and Articulation Synthesis Metrics on Revolute Scenes. <sup>†</sup>DTA requires ground-truth depth.

| Scene               | Method           | PSNR $\uparrow$ | SSIM $\uparrow$ | LPIPS $\downarrow$ | Depth MAE $\downarrow$ | IoU <sub>s</sub> $\uparrow$ | IoU <sub>m</sub> $\uparrow$ | IoU <sub>bg</sub> $\uparrow$ | mIoU $\uparrow$ |
|---------------------|------------------|-----------------|-----------------|--------------------|------------------------|-----------------------------|-----------------------------|------------------------------|-----------------|
| 3558<br>Bottle      | PARIS            | 35.75           | 0.981           | 0.0276             | 0.120                  | 0.976                       | 0.676                       | 0.999                        | 0.883           |
|                     | DTA <sup>†</sup> | N/A             | N/A             | N/A                | 0.026                  | 0.929                       | 0.580                       | 0.999                        | 0.836           |
|                     | SPLART           | 42.05           | 0.996           | 0.0076             | 0.034                  | 0.994                       | 0.968                       | 1.000                        | 0.987           |
| 12085<br>Dishwasher | PARIS            | 30.81           | 0.954           | 0.0927             | 0.111                  | 0.964                       | 0.929                       | 0.994                        | 0.962           |
|                     | DTA <sup>†</sup> | N/A             | N/A             | N/A                | 0.113                  | 0.873                       | 0.773                       | 0.982                        | 0.876           |
|                     | SPLART           | 35.70           | 0.988           | 0.0388             | 0.019                  | 0.985                       | 0.965                       | 0.998                        | 0.983           |
| 27189<br>Table      | PARIS            | 29.55           | 0.887           | 0.1618             | 0.131                  | 0.958                       | 0.866                       | 0.995                        | 0.940           |
|                     | DTA <sup>†</sup> | N/A             | N/A             | N/A                | 0.044                  | 0.964                       | 0.889                       | 0.992                        | 0.948           |
|                     | SPLART           | 34.76           | 0.963           | 0.0560             | 0.035                  | 0.979                       | 0.949                       | 0.998                        | 0.975           |
| 100248<br>Suitcase  | PARIS            | F               | F               | F                  | F                      | F                           | F                           | F                            | F               |
|                     | DTA <sup>†</sup> | N/A             | N/A             | N/A                | 0.025                  | 0.986                       | 0.574                       | 0.998                        | 0.853           |
|                     | SPLART           | 39.76           | 0.995           | 0.0104             | 0.038                  | 0.995                       | 0.934                       | 0.999                        | 0.976           |
| 101713<br>Pen       | PARIS            | F               | F               | F                  | F                      | F                           | F                           | F                            | F               |
|                     | DTA <sup>†</sup> | N/A             | N/A             | N/A                | 0.037                  | 0.956                       | 0.319                       | 0.999                        | 0.758           |
|                     | SPLART           | 40.85           | 0.998           | 0.0135             | 0.028                  | 0.981                       | 0.789                       | 1.000                        | 0.923           |
| 102016<br>USB       | PARIS            | 31.45           | 0.970           | 0.1005             | 0.191                  | 0.731                       | 0.583                       | 0.994                        | 0.769           |
|                     | DTA <sup>†</sup> | N/A             | N/A             | N/A                | 0.157                  | 0.710                       | 0.553                       | 0.979                        | 0.747           |
|                     | SPLART           | 35.08           | 0.987           | 0.0475             | 0.054                  | 0.659                       | 0.533                       | 0.998                        | 0.730           |
| 102812<br>Switch    | PARIS            | 35.23           | 0.984           | 0.0433             | 0.102                  | 0.987                       | 0.908                       | 0.998                        | 0.964           |
|                     | DTA <sup>†</sup> | N/A             | N/A             | N/A                | 0.024                  | 0.970                       | 0.616                       | 0.996                        | 0.861           |
|                     | SPLART           | 38.69           | 0.995           | 0.0235             | 0.031                  | 0.995                       | 0.971                       | 0.999                        | 0.988           |
| 103042<br>Window    | PARIS            | 29.11           | 0.967           | 0.0808             | 0.127                  | 0.859                       | 0.631                       | 0.996                        | 0.829           |
|                     | DTA <sup>†</sup> | N/A             | N/A             | N/A                | 0.088                  | 0.900                       | 0.744                       | 0.991                        | 0.878           |
|                     | SPLART           | 32.35           | 0.984           | 0.0499             | 0.039                  | 0.868                       | 0.695                       | 0.999                        | 0.854           |
| 103549<br>Toaster   | PARIS            | F               | F               | F                  | F                      | F                           | F                           | F                            | F               |
|                     | DTA <sup>†</sup> | F               | F               | F                  | F                      | F                           | F                           | F                            | F               |
|                     | SPLART           | 39.04           | 0.994           | 0.0195             | 0.036                  | 0.997                       | 0.949                       | 0.999                        | 0.982           |
| 103941<br>Phone     | PARIS            | 34.21           | 0.972           | 0.0592             | 0.089                  | 0.938                       | 0.956                       | 0.998                        | 0.964           |
|                     | DTA <sup>†</sup> | N/A             | N/A             | N/A                | 0.027                  | 0.913                       | 0.952                       | 0.997                        | 0.954           |
|                     | SPLART           | 39.42           | 0.993           | 0.0219             | 0.020                  | 0.971                       | 0.980                       | 0.999                        | 0.984           |
| mean                | PARIS            | 32.30           | 0.959           | 0.0808             | 0.124                  | 0.916                       | 0.793                       | 0.996                        | 0.902           |
|                     | DTA <sup>†</sup> | N/A             | N/A             | N/A                | 0.060                  | 0.911                       | 0.667                       | 0.993                        | 0.857           |
|                     | SPLART           | 37.77           | 0.989           | 0.0288             | 0.033                  | 0.942                       | 0.873                       | 0.999                        | 0.938           |

Table 10. SPLART-PMS Novel View and Articulation Synthesis Metrics on Prismatic Scenes. <sup>†</sup>DTA requires ground-truth depth.
